# Supplementary material for: Pressure-promoted highly-ordered Fe-doped-Ni2B for effective oxygen evolution reaction and overall water splitting
Source: Royal Society of Chemistry journal article supplement (doi:10.1039/d0ta10010b), 2021-01-01
Supplement: d0ta10010b1.pdf [file d0ta10010b1.pdf]

## Supporting Information

### **Pressure-Promoted Highly-Ordered Fe-doped-Ni<sub>2</sub>B for Effective Oxygen Evolution Reaction and Overall Water Splitting**

Ruifeng Tian,<sup>†a</sup> Shijing Zhao,<sup>†b</sup> Junkai Li,<sup>†b</sup> Zhibin Chen,<sup>a</sup> Wenfeng Peng,<sup>b</sup> Yan He,<sup>c</sup>  
Lili Zhang,<sup>c</sup> Shuai Yan,<sup>c</sup> Lailei Wu,<sup>\*a</sup> Rajeev Ahuja,<sup>d</sup> Huiyang Gou<sup>\*b</sup>

*State Key Laboratory of Metastable Materials Science and Technology, College of Material Science and Engineering, Yanshan University, Qinhuangdao 066004, China.  
Email: wll@ysu.edu.cn.*

*Center for High Pressure Science and Technology Advanced Research, Beijing 100094, China. Email: huiyang.gou@hpstar.ac.cn*

*Shanghai Synchrotron Radiation Facility, Shanghai Advanced Research Institute, Chinese Academy of Sciences, Shanghai 201203, China*

*Condensed Matter Theory Group, Department of Physics & Astronomy, Uppsala University, 751 20 Uppsala, Sweden*

<sup>†</sup> RT, SZ and JL are contributed equally to this work

Corresponding authors: wll@ysu.edu.cn and huiyang.gou@hpstar.ac.cn

## Experimental details

### MNiBs synthesis:

Chemicals: iron nanopowder, cobalt nanopowder, nickel nanopowder and amorphous boron nanopowder all bought from Aladdin. All chemicals were used as received without further purification.

Sample preparation: Transition metal powder and boron powder were weighed at mole ratio of mole ratio of 1:1:1.05 for FeNiB and CoNiB and 2:1.05 for Ni<sub>2</sub>B and mixed by hand using agate mortar and pestle for no less than 30 min, then pressed into tablets using tabling machine and mold. Samples for HPHT synthesis is assembled with tablets, h-BN and graphite furnace. All steps above were performed under argon atmosphere inside a glovebox to keep oxygen and water free.

HTHP synthesis: two parallel samples for each composition were assembled inside a pyrophyllite cube along with three graphite tablets and two steel caps, then were placed into the cubic press (CS1B, Guilin) chamber. The synthesis is under 5 GPa and 1300 °C for 20 min.

TM<sub>2</sub>Bs powder synthesis: TM<sub>2</sub>B tablets were cleaned by hand to carve off h-BN on its surface then cleaned with alcohol. The cleaned tables were broken into small pieces with pliers and milled into powder using agate mortar and pestle. The TM<sub>2</sub>B powders were further refined with planet ball-milling machine using tungsten carbide pot and balls at 350 rpm for 10h. The refined powders were sealed under argon inside a glovebox to prevent oxidation.

Nickel foam cleaning: In order to remove the protective oil and surface oxidation layer of nickel foam, nickel foam pieces (1cm × 1cm) were cleaned by acetone using an ultrasonic bath for 10 min; then the nickel foam pieces were immersed in 0.5 M HCl for 10 min, finally cleaned with distilled water and ethanol and dried in a drier at 40°C.

Electrode preparation: All three TM<sub>2</sub>B samples and commercial RuO<sub>2</sub> were loaded on nickel foam. 4 mg sample along with 1mg carbon black and 30 μ L PTFE (Polytetrafluoroethylene) binder were loaded on a 10 mm × 10 mm bare nickel foam. An Hg/HgO electrode was used as reference electrode and a 10 mm × 10 mm Pt foil electrode as counter electrode. 4mg TM<sub>2</sub>B powders and 1mg carbon black were mixed with 30 μl PTFE and 1 ml ethanol and ultrasonic bath for 10 min. The mixture was dried in the drier for 5 min to remove excessive ethanol. Then the mixture was collected and smeared on the cleaned nickel foam using a trace spoon. The smeared surface area covered half surface area of nickel foam, thus the geometry surface area of electrode is 10 mm × 10 mm.

### Physicochemical characterization

The crystal structure of synthesized TM<sub>2</sub>Bs were examined by X-ray diffraction (XRD) diffractometer (Rigaku D/MAX-2500/PC) with Cu K $\alpha$  radiation ( $\lambda = 1.5406 \text{ \AA}$ ) at 40 kV and 200 mA. The morphology of TM<sub>2</sub>Bs were examined by scanning electron microscope (SEM, Hitachi S-4800) and the morphology of FeNiB before and after electrochemical test were examined by

transmission electron microscope (TEM, JEOL JEM-2100F). Their surface elemental compositions and properties were further examined by X-ray photoelectron spectroscopy (XPS, AXIS Ultra DLD, Japan). XAS X-ray absorption spectroscopy (XAS) was performed on the BL15U1 beamline at the Shanghai Synchrotron Radiation Facility (SSRF) and Cornell High Energy Synchrotron Source (CHESS) in United States, and the storage ring was operated at 250 mA mode with a Si (111) double crystal monochromator.

### **Electrochemical performance test**

All electrochemical measurements were carried out in a typical three-electrode setup on a CHI-760e electrochemical workstation. The as-prepared samples were used as working electrodes while a Pt foil and Hg/HgO (1.0 M KOH) electrode served as the counter electrode and the reference electrode, respectively. All tests were conducted in 1 M KOH electrolyte.

The linear sweep voltammetry (LSV) curves were collected at a potential scan rate of 5 mV s<sup>-1</sup>. All of the measured potentials were converted to the reversible hydrogen electrode (RHE) according to the following equation:

$$E_{\text{RHE}} = E_{\text{Hg/HgO}} + 0.098 + 0.059\text{pH}$$

Electrochemical impedance spectroscopy (EIS) measurements were conducted in the frequency range from 0.1 Hz to 100 kHz at an overpotential of 250 mV (vs. RHE) with a 5 mV sinusoidal perturbation.

The electrochemically active surface area (ECSA) of electrocatalysts was calculated by the following equation:

$$\text{ECSA} = C_{\text{dl}} / C_s \times S$$

where  $C_{\text{dl}}$  is determined from cyclic voltammogram (CV) in the double layer region (without faradaic processes) at different scan rates,  $C_s$  is a general surface specific capacitance (0.040 mF·cm<sup>-2</sup> in 1 M KOH for common electrocatalysts)<sup>[1]</sup>,  $S$  is the geometric surface area of the electrode (0.5 cm<sup>2</sup> in this work).

The turnover frequency (TOF) of electrocatalysts was calculated by the following equation:

$$\text{TOF} = (JA) / (4Fn)$$

Where  $J$  is the current density at a certain overpotential,  $A$  is the surface area of the electrode, 4 is the mole of electrons transferred to generate one mole of O<sub>2</sub>,  $F$  is the Faraday constant (96485 C·mol<sup>-1</sup>),  $n$  is the number of moles of active sites.

### **Inductively coupled plasma optical emission spectrometer (ICP-OES)**

The ratio of Fe(Co):Ni in FeNiB or CoNiB was also quantitative measured by the inductively coupled plasma optical emission spectrometer (ICP-OES) method (Thermo Fisher, ICAP 6300).

RF power was set at 1150 W. The spectral lines 233.28, 230.79 and 231.60 nm were selected for Fe, Co and Ni respectively. As a result, the obtained atomic ratio of Fe:Ni and Co:Ni were 1:1.03 and 1:1.05 for FeNiB and CoNiB, respectively.

### **Density functional theory (DFT) calculations**

In the present work, we have used the Ab-initio electronic structure calculations based on density functional theory (DFT). A projected augmented wave (PAW) method is used which is implemented in the Vienna ab-initio simulation package (VASP) package. The Perdew-Burke-Ernzerhof (PBE) exchange correlation functional is in the form of generalized gradient approximation (GGA) was used in these calculations. An energy cutoff of 500 eV was used to achieve the energy convergence as well as the force convergence. We used the Brillouin zone (BZ) with a dense Monkhorst-Pack k-grid of  $10 \times 10 \times 12$  points. The lattice parameters of  $\text{Ni}_2\text{B}$ ,  $\text{Fe}_2\text{B}$  and FeNiB single unit cells were optimized prior to electronic properties calculations.

In order to find the most favorable structure of stoichiometric FeNiB, 50% of Ni atoms in  $\text{Ni}_2\text{B}$  structure were replaced by Fe atoms. There are four Ni atoms in  $\text{Ni}_2\text{B}$  primitive cell, thus four different combinations could be made for Fe atom replacement (1-2, 1-3, 1-4, 2-3, 2-4 and 3-4, Figure S1). It turned out that 1-4 and 2-3 were the most stable structure and they are actually the same structure due to the symmetry process. Thus, this structure was adopted for FeNiB electronic calculation.

## Tables

**Table S1** Results of Rietveld refinements.

|                   | $a$ (Å) | $b$ (Å) | $c$ (Å) | $a/c$ | $\chi^2$ | $R_{wp}$ | $R_p$ |
|-------------------|---------|---------|---------|-------|----------|----------|-------|
| Ni <sub>2</sub> B | 4.990   | 4.990   | 4.247   | 1.175 | 1.82     | 3.55%    | 5.95% |
| CoNiB             | 5.022   | 5.022   | 4.230   | 1.187 | 1.66     | 1.76%    | 1.2%  |
| FeNiB             | 5.068   | 5.068   | 4.235   | 1.197 | 1.98     | 1.64%    | 1.17% |

**Table S2** Summary of bond lengths (in Å) from the Rietveld refinements results.

|                   | B-B   | TM-B  | TM-TM | TM-TM | TM-TM | TM-TM |
|-------------------|-------|-------|-------|-------|-------|-------|
| Ni <sub>2</sub> B | 2.123 | 2.139 | 2.367 | 2.420 | 2.627 | 2.704 |
| CoNiB             | 2.115 | 2.160 | 2.296 | 2.460 | 2.664 | 2.666 |
| FeNiB             | 2.118 | 2.162 | 2.410 | 2.420 | 2.666 | 2.719 |

**Table S3** The simulation results according to the equivalent circuit model in Fig. 4d.  $R_{sol}$ : solution resistance;  $R_{ct}$ : charge transfer resistance;  $R_{oxide}$ : oxide resistance.

| Resistance/ $\Omega$ | FeNiB | CoNiB | Ni <sub>2</sub> B | RuO <sub>2</sub> |
|----------------------|-------|-------|-------------------|------------------|
| $R_{sol}$            | 2.018 | 1.672 | 1.94              | 1.461            |
| $R_{ct}$             | 3.334 | 43.73 | 67.94             | 42.05            |
| $R_{oxide}$          | 4.83  | 21.57 | 4.68              | 3.62             |

**Table S4** OER performance of different transition metal boride electrocatalysts.

| catalysts                           | $\eta_{10}$ (mV) | Tafel slope (mF dec <sup>-1</sup> ) | Reference |
|-------------------------------------|------------------|-------------------------------------|-----------|
| FeNiB                               | 257.4            | 110                                 | This work |
| CoNiB                               | 302.4            | 120                                 | This work |
| Ni <sub>2</sub> B                   | 300.4            | 134                                 | This work |
| Ni <sub>x</sub> B/f-MWCNT           | 286              | 46.3                                | [1]       |
| nanocotton-like amorphous Ni-Co-B   | 300              | 139                                 | [2]       |
| FeNi@FeNiB-700                      | 272              | 89.2                                | [3]       |
| Fe-B-O@FeB <sub>2</sub>             | 260              | 58.7                                | [4]       |
| Ni-B-O@Ni <sub>3</sub> B            | 350              | 80.9                                | [5]       |
| Fe-Co-2.3Ni-B                       | 274              | 38                                  | [6]       |
| Boronized NiFe sheet                | 309              | 40                                  | [7]       |
| NiCoFeB nanochains                  | 284              | 46.4                                | [8]       |
| Co-Ni-B@NF                          | 313              | 120                                 | [9]       |
| Co-10Ni-B-sp                        | 310              | 66                                  | [10]      |
| Co-Fe-B-P                           | 225              | 40                                  | [11]      |
| Co <sub>2</sub> B/CoSe <sub>2</sub> | 320              | 56                                  | [12]      |

**Table S5** Overall water splitting voltage of different electrocatalysts.

| Catalysts                              | Cell voltage@10mA cm <sup>-2</sup> | Reference |
|----------------------------------------|------------------------------------|-----------|
| FeNiB                                  | 1.538                              | This work |
| CoNiB                                  | 1.602                              | This work |
| Ni <sub>2</sub> B                      | 1.621                              | This work |
| Ni <sub>x</sub> B/f-MWCNT              | 1.602                              | [1]       |
| FeNi@FeNiB-700                         | 1.65                               | [3]       |
| Ni-B-O@Ni <sub>3</sub> B               | 1.58                               | [5]       |
| Fe-Co-2.3Ni-B                          | 1.52 (@20mA cm <sup>-2</sup> )     | [6]       |
| NiCoFeB nanochains                     | 1.75                               | [8]       |
| Co-Ni-B@NF                             | 1.72                               | [9]       |
| LiCoBPO                                | 1.53                               | [13]      |
| Co-Fe oxyphosphide MTs                 | 1.69                               | [14]      |
| N-NiMoO <sub>4</sub> /NiS <sub>2</sub> | 1.6                                | [15]      |
| Co-Fe-B-P                              | 1.68                               | [11]      |
| Co <sub>2</sub> B/CoSe <sub>2</sub>    | 1.73                               | [12]      |

## Figures

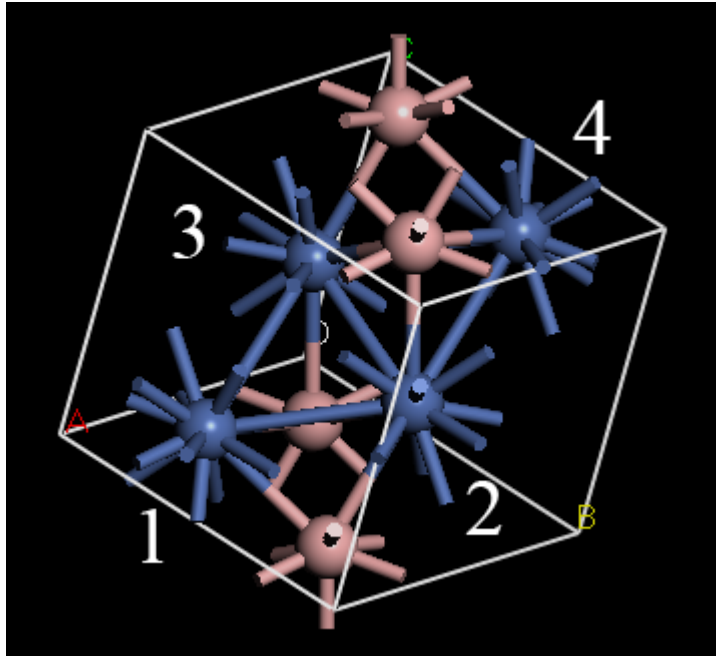

**Fig. S1** Illustration of Ni<sub>2</sub>B primitive cell and four different atom sites.

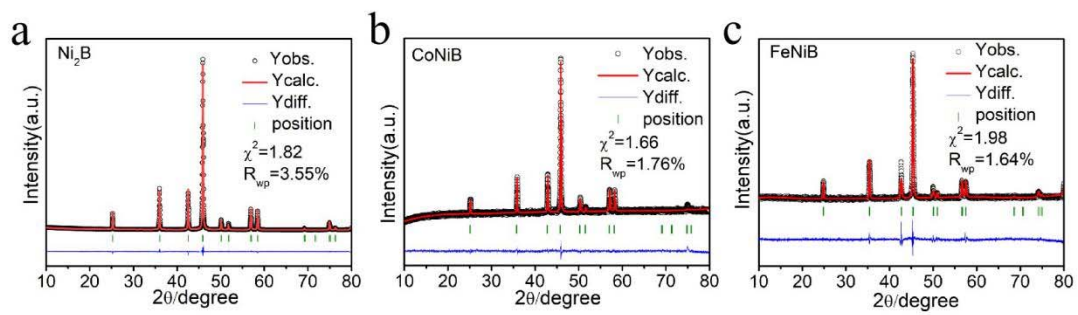

**Fig. S2** XRD Rietveld refinement patterns of (a)  $\text{Ni}_2\text{B}$ ; (b)  $\text{CoNiB}$ ; (c)  $\text{FeNiB}$ .



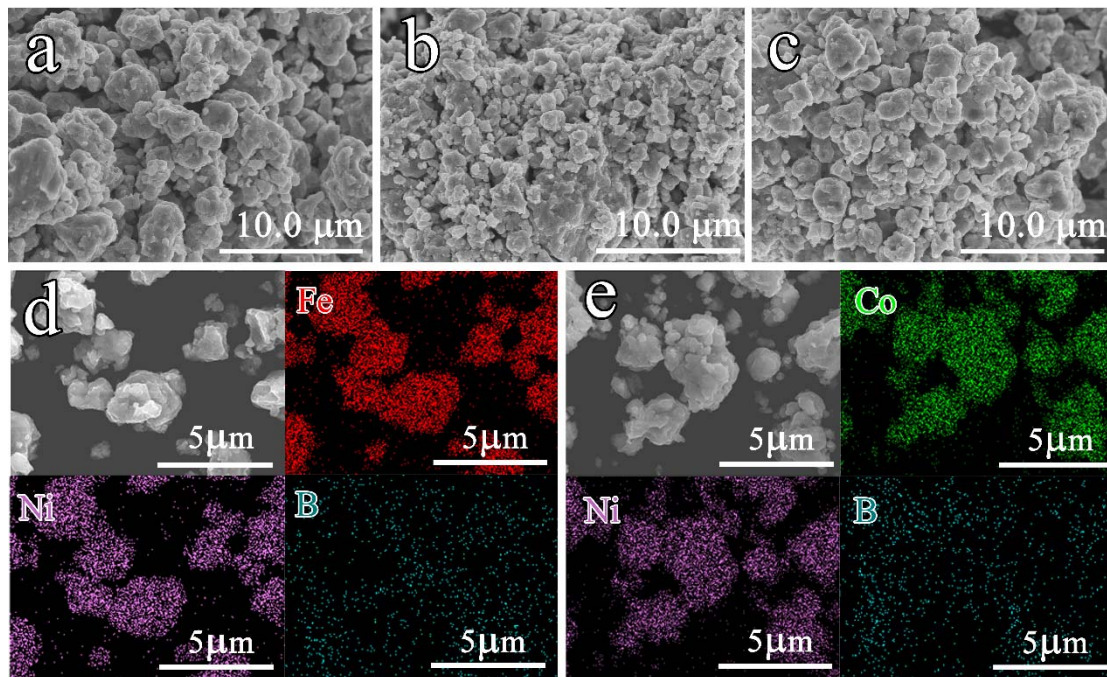

**Fig. S3** SEM images of (a) FeNiB, (b) CoNiB and (c) Ni<sub>2</sub>B after ball milling for 10h. And EDS mapping results of (d) FeNiB and (f) CoNiB.

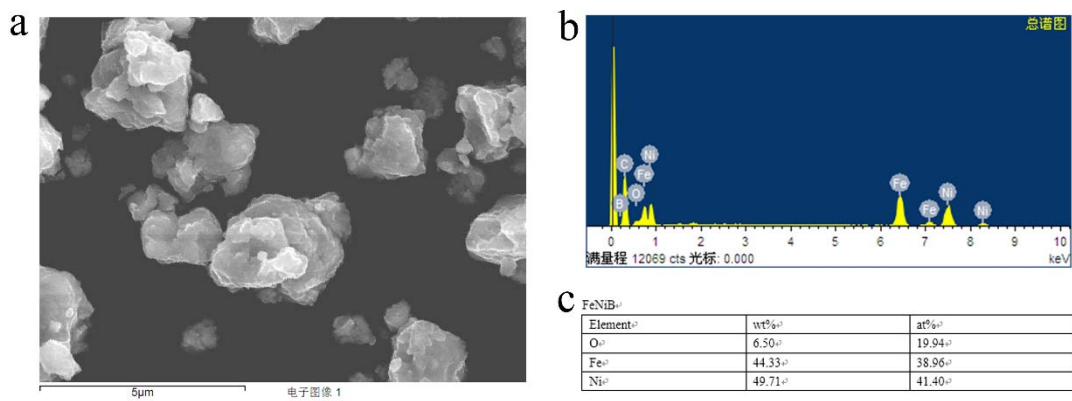

**Fig. S4** EDS mapping results of FeNiB: (a) EDS image; (b) EDS spectrogram; (c) EDS qualification results.

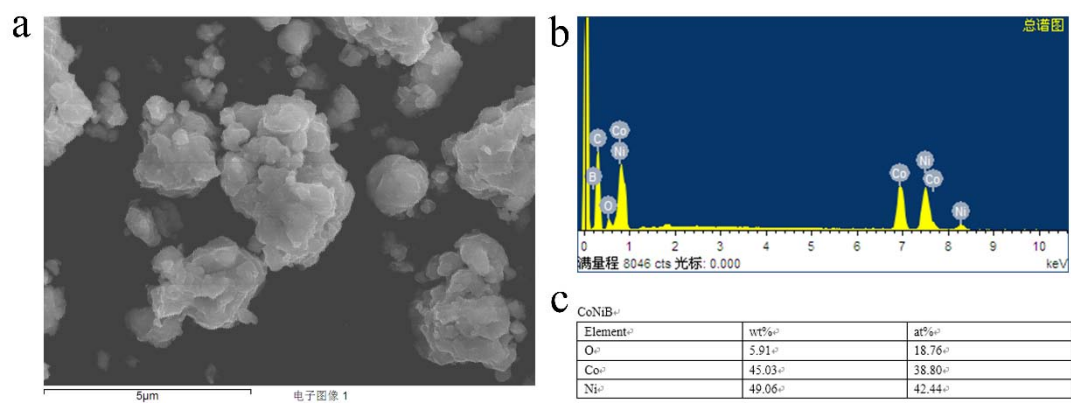

**Fig. S5** EDS mapping results of CoNiB: (a) EDS image; (b) EDS spectrogram and (c) EDS qualification results.

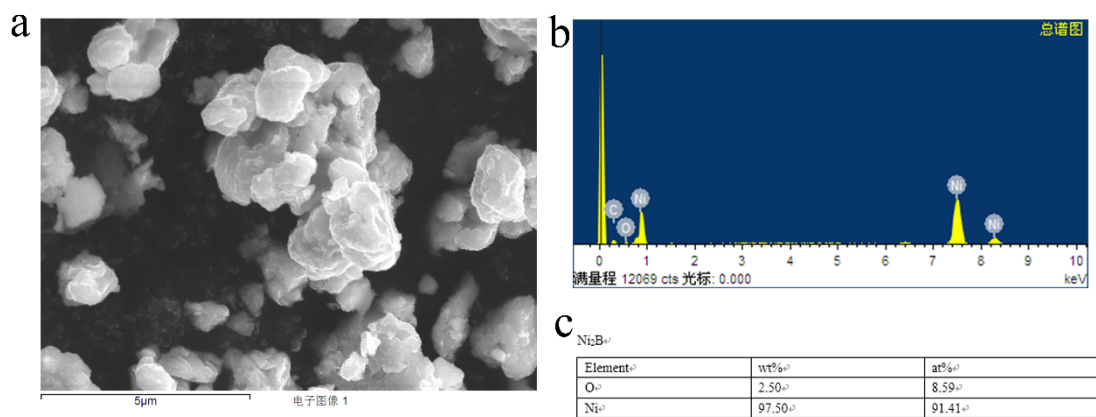

**Fig. S6** EDS mapping results of Ni<sub>2</sub>B: (a) EDS image; (b) EDS spectrogram; (c) EDS qualification results.

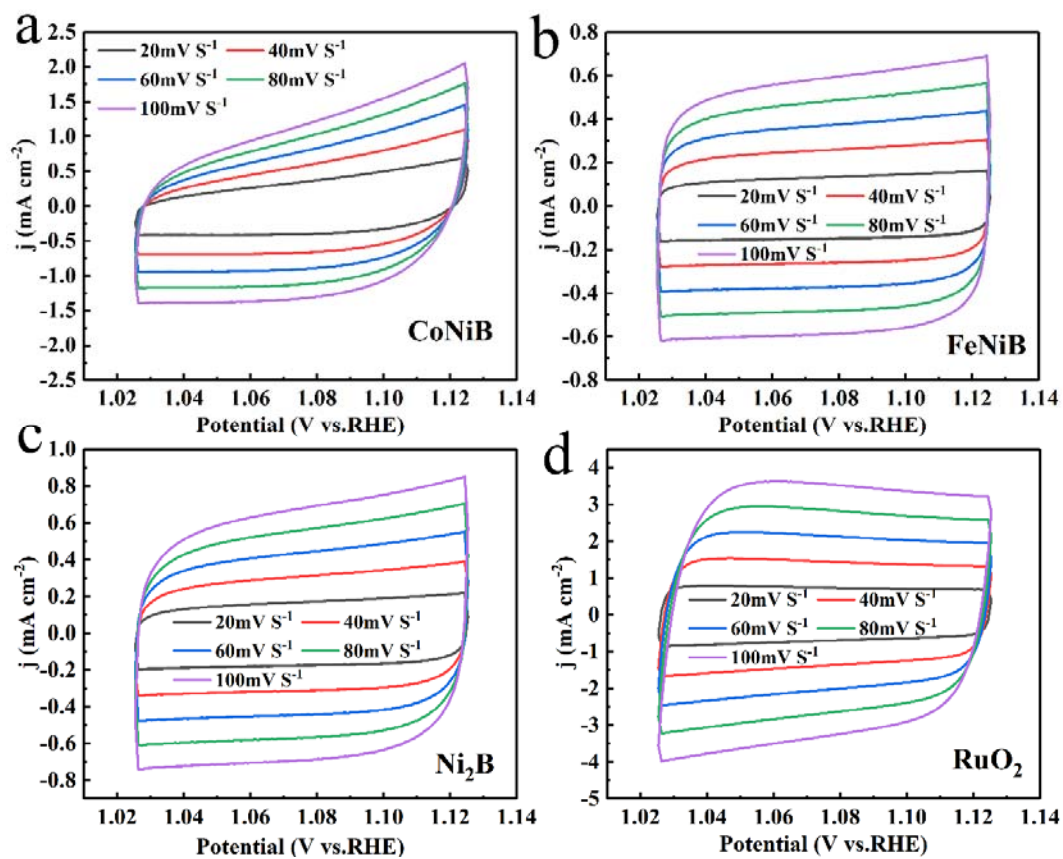

**Fig. S7** CV curves for double-layer capacitance measurements under different scan rates from 20 to 100 mV·S<sup>-1</sup>.

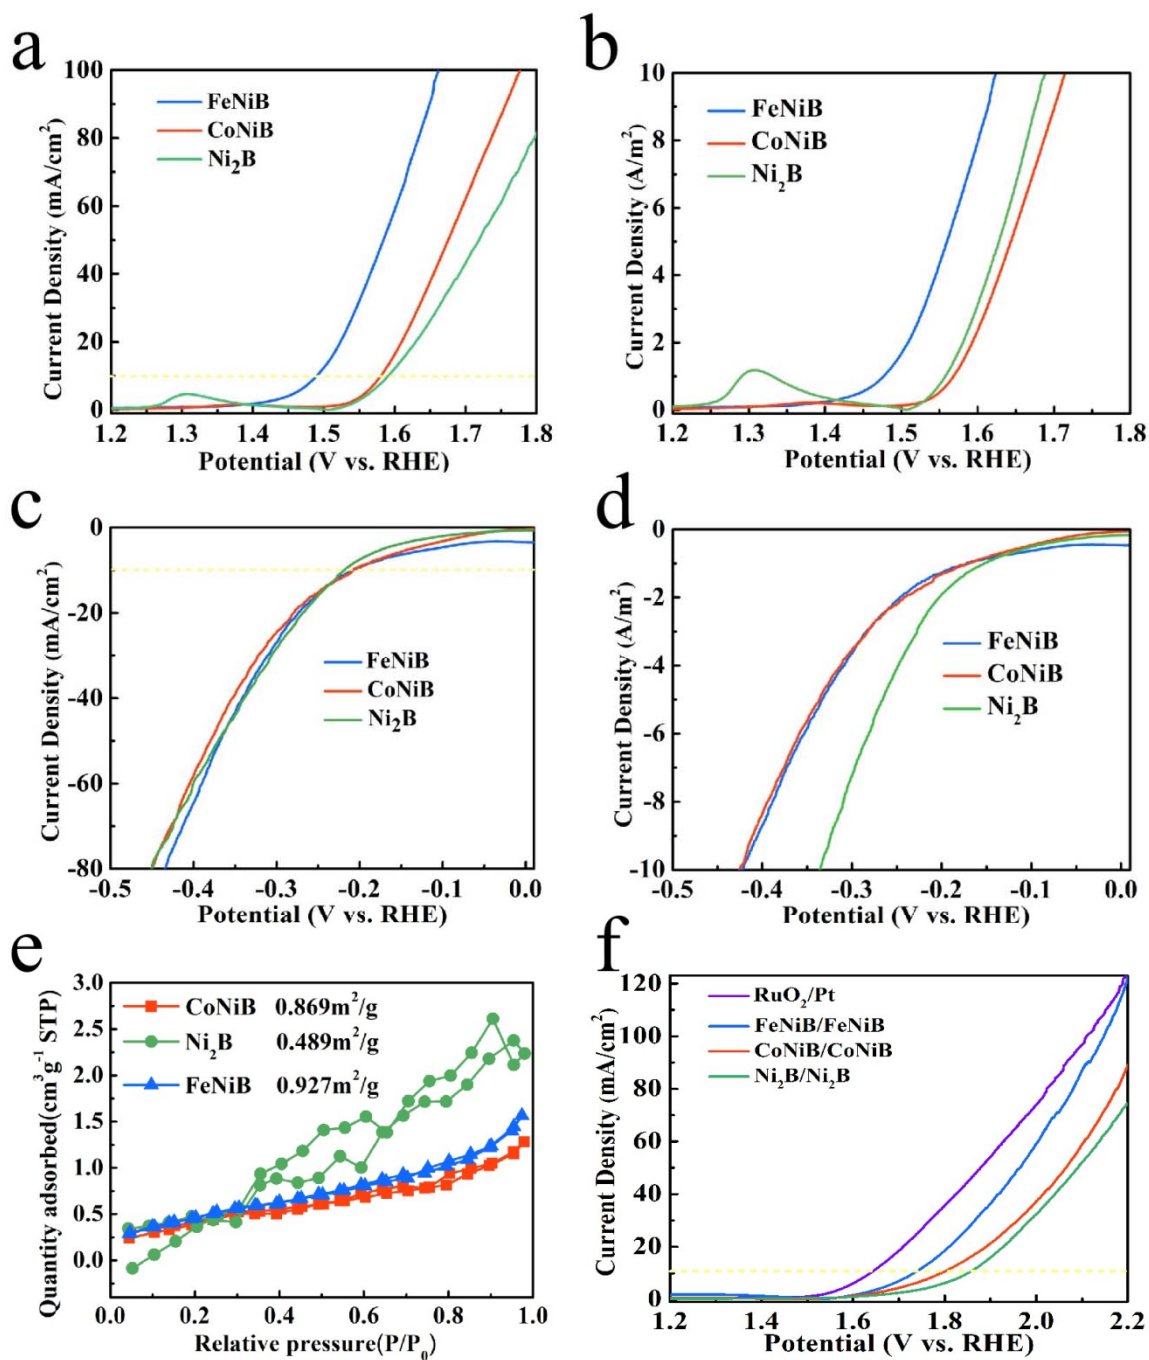

**Fig. S8** (a) The OER LSV curves of compounds after several tests. (b) Surface area normalized OER LSV curves in (a). (c) The HER LSV curves of the three compounds. (d) Surface area normalized HER LSV curves. (e) N<sub>2</sub> adsorption-desorption isotherms of the FeNiB, CoNiB, Ni<sub>2</sub>B and their specific surface area. (f) The overall water splitting results of different samples.

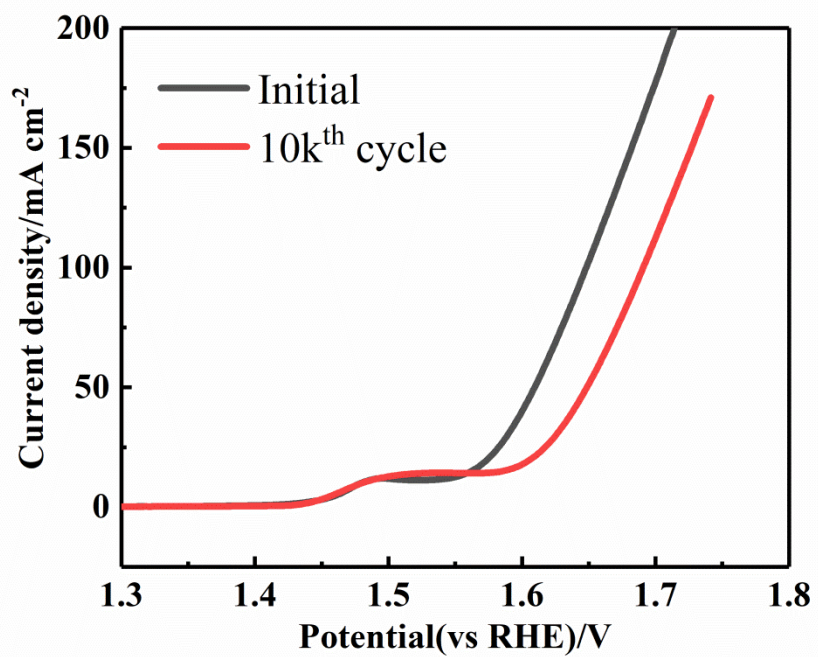

**Fig. S9** LSV curve of fresh-made RuO<sub>2</sub> and RuO<sub>2</sub> after cyclic voltammetry for 10k circles.

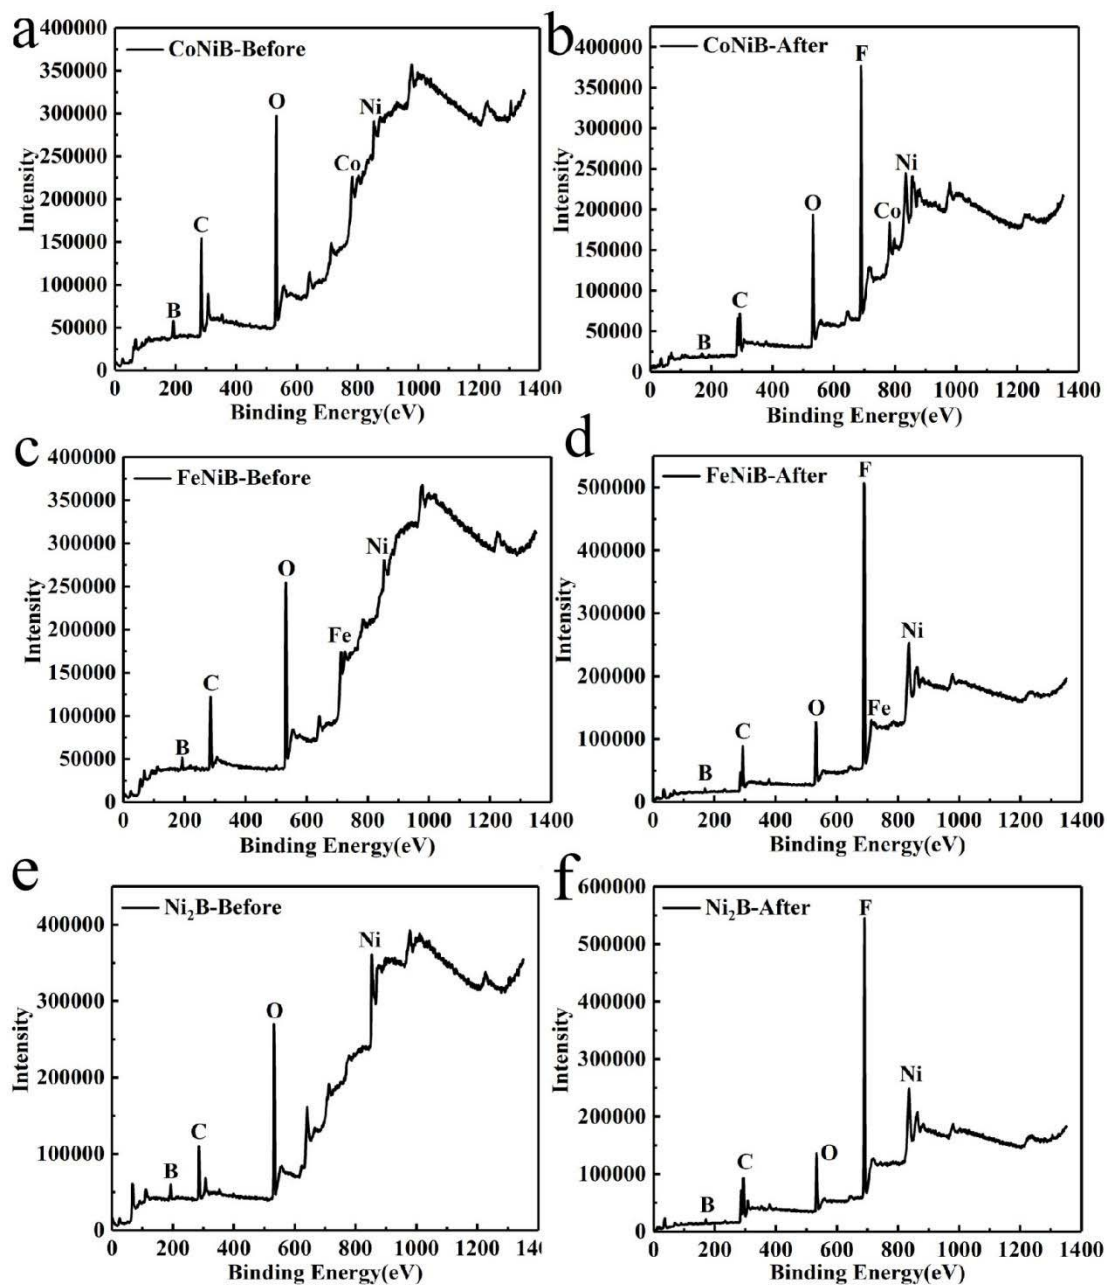

**Fig. S10** XPS survey spectrum of CoNiB before (a) and after (b) durability test; XPS survey spectrum of FeNiB before (c) and after (d) durability test; XPS survey spectrum of Ni<sub>2</sub>B before (e) and after (f) durability test.



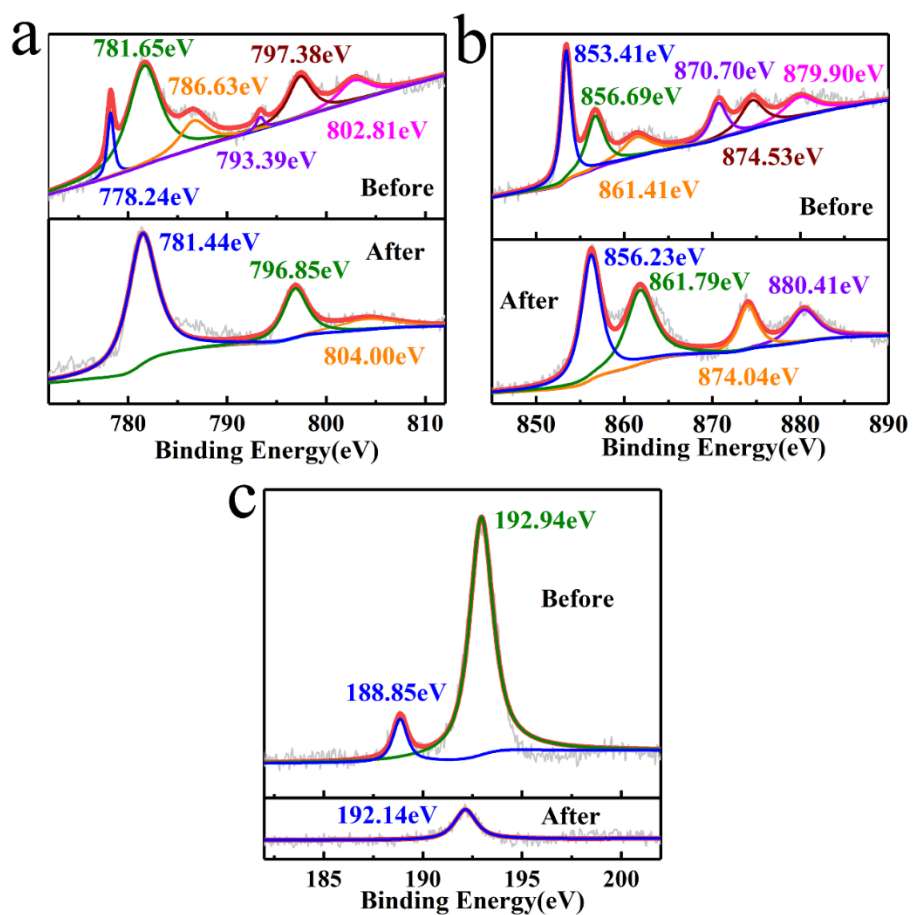

Fig. S11 High resolution XPS spectrum of CoNiB (a) Co 2p; (b) Ni 2p; (c) B 1s.

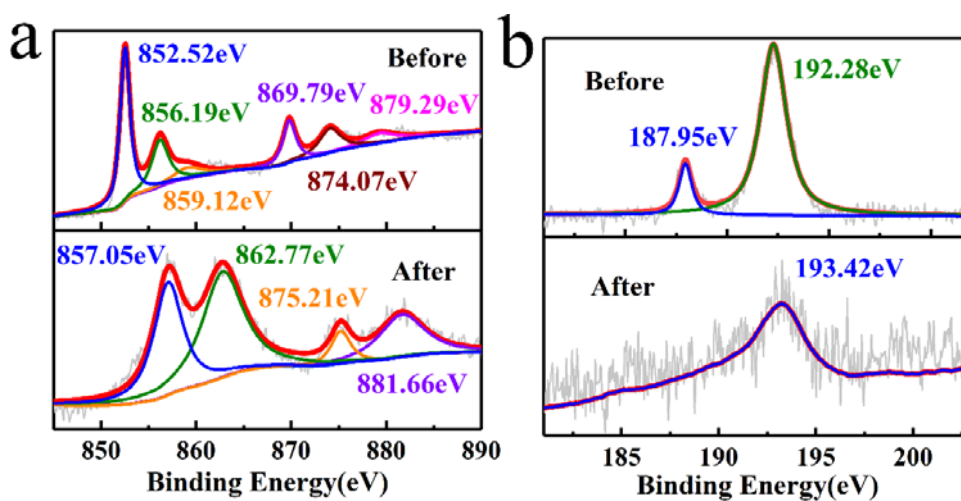

Fig. S12 High resolution XPS spectrum of Ni<sub>2</sub>B (a) Ni 2p; (b) B 1s.

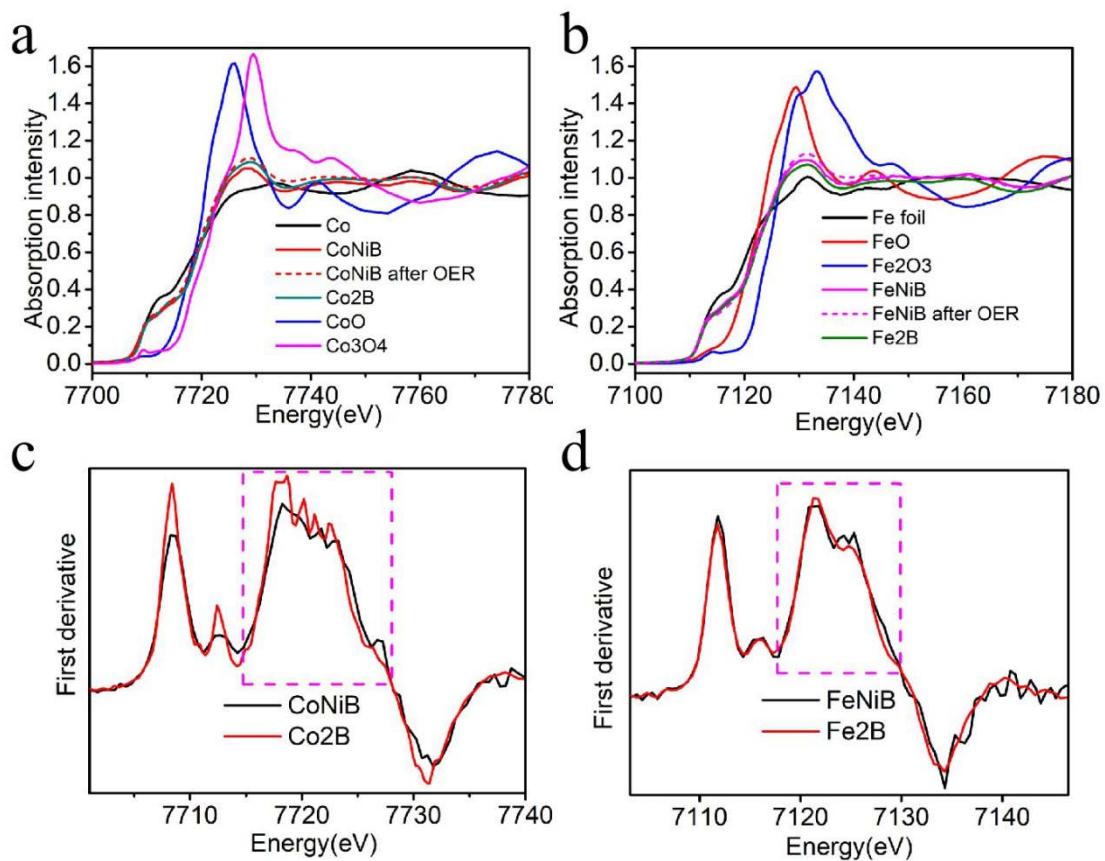

**Fig. S13** (a) XANES of CoNiB before/after OER and reference materials collected at Co K edge; (b) XANES of FeNiB before/after OER and reference materials collected at Fe K edge; (c) First derivative of XANES of CoNiB and Co<sub>2</sub>B at Co K edge; (d) First derivative of XANES of FeNiB and Fe<sub>2</sub>B at Fe K edge.

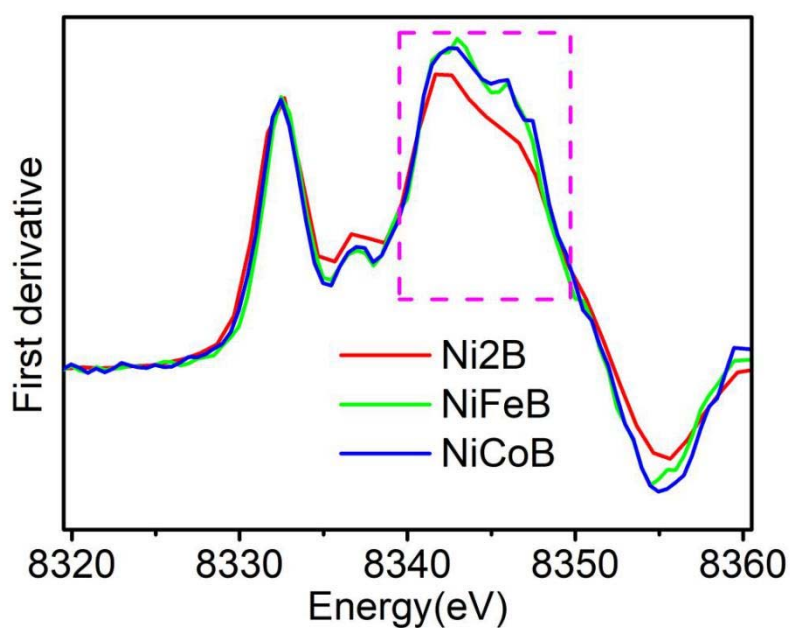

**Fig. S14** First derivative of XANES of Ni<sub>2</sub>B, NiCoB and NiFeB at Ni K edge.

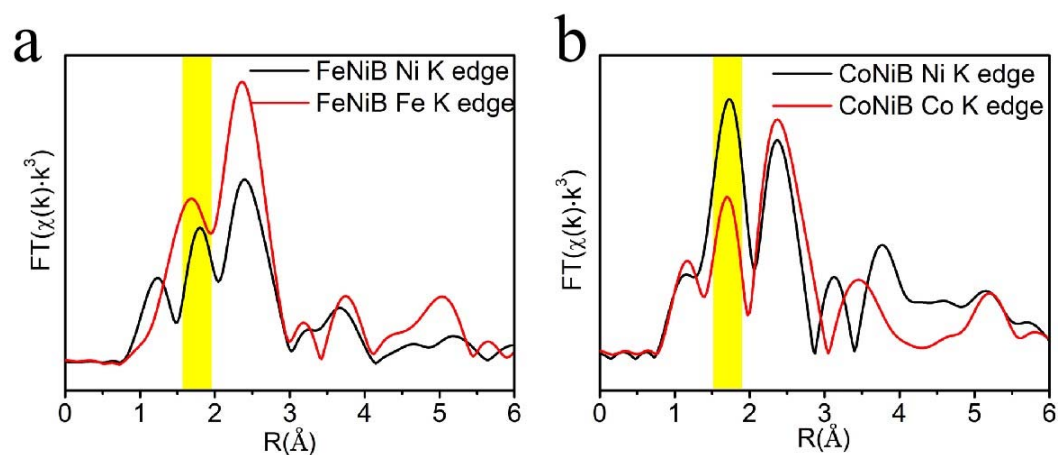

**Fig. S15** (a) Fourier transformed  $k^3$  weighted EXAFS oscillations of FeNiB measured at Ni K edge and Fe K edge; (b) Fourier transformed  $k^3$  weighted EXAFS oscillations of NiCoB measured at Ni K edge and Co K edge.

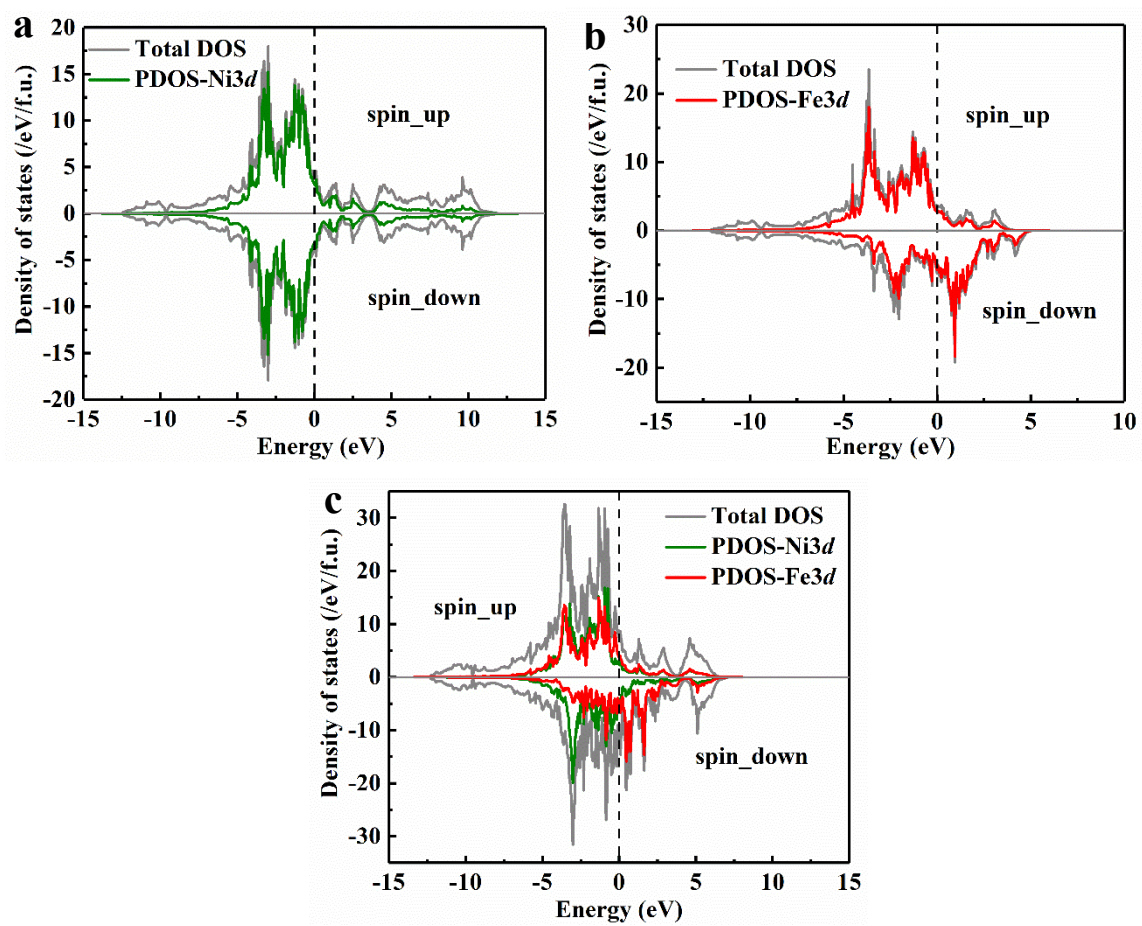

**Fig. S16** Total DOS and PDOS of Ni 3d orbital in  $\text{Ni}_2\text{B}$  (a), Fe 3d orbital in  $\text{Fe}_2\text{B}$  (b), Ni 3d and Fe 3d orbital in  $\text{FeNiB}$ .

## Reference

- [1] X. Chen, Z. Yu, L. Wei, Z. Zhou, S. Zhai, J. Chen, Y. Wang, Q. Huang, H. E. Karahan, X. Liao, Y. Chen, *J. Mater. Chem. A* 2019, 7, 764.
- [2] S. Wang, P. He, Z. Xie, L. Jia, M. He, X. Zhang, F. Dong, H. Liu, Y. Zhang, C. Li, *Electrochim. Acta* 2019, 296, 644.
- [3] H. Yuan, S. Wang, X. Gu, B. Tang, J. Li, X. Wang, *J. Mater. Chem. A* 2019, 7, 19554.
- [4] L. Wang, J. Li, X. Zhao, W. Hao, X. Ma, S. Li, Y. Guo, *Adv. Mater. Interfaces* 2019, 6, 1801690.
- [5] W. Yuan, X. Zhao, W. Hao, J. Li, L. Wang, X. Ma, Y. Guo, *ChemElectroChem* 2019, 6, 764.
- [6] J. M. V. Nsanzimana, Y. Peng, Y. Y. Xu, L. Thia, C. Wang, B. Y. Xia, X. Wang, *Adv. Energy Mater.* 2018, 8, 1701475.
- [7] F. Guo, Y. Wu, H. Chen, Y. Liu, L. Yang, X. Ai, X. Zou, *Energy Environ. Sci.* 2019, 12, 684.
- [8] Y. Li, B. Huang, Y. Sun, M. Luo, Y. Yang, Y. Qin, L. Wang, C. Li, F. Lv, W. Zhang, S. Guo, *Small* 2019, 15, 1804212
- [9] N. Xu, G. Cao, Z. Chen, Q. Kang, H. Dai, P. Wang, *J. Mater. Chem. A* 2017, 5, 12379.
- [10] J. Zhang, X. Li, Y. Liu, Z. Zeng, X. Cheng, Y. Wang, W. Tu, M. Pan, *Nanoscale* 2018, 10, 11997.
- [11] Z. Wu, D. Nie, M. Song, T. Jiao, G. Fu, X. Liu, *Nanoscale* 2019, 11 7506.
- [12] Y. Guo, Z. Yao, C. Shang, E. Wang, *ACS Appl. Mater. Interfaces* 2017, 9 3931.
- [13] P. W. Menezes, A. Indra, I. Zaharieva, C. Walter, S. Loos, S. Hoffmann, R. Schlögl, H. Dau, M. Driess, *Energy Environ. Sci.* 2019, 12, 988.
- [14] P. Zhang, X. F. Lu, J. Nai, S. Q. Zang, X. W. Lou, *Adv. Sci.* 2019, 6, 1900576.
- [15] L. An, J. Feng, Y. Zhang, R. Wang, H. Liu, G. C. Wang, F. Cheng, P. Xi, *Adv. Funct. Mater.* 2019, 29, 1805298.
